# Supplementary material for: Microvillous cells in the olfactory epithelium express elements of the solitary chemosensory cell transduction signaling cascade
Source: PLoS One. 2018 Sep 13;13(9):e0202754. doi: 10.1371/journal.pone.0202754 (PMC6136699; doi:10.1371/journal.pone.0202754)
Supplement: S1 Table — Analysis of differential gene expression of mouse olfactory sensory neurons (OSNs) and whole olfactory mucosa (WOM) obtained by Saraiva et al. [21]. The data reported in this table are the represented in Fig 2. Original data: https://doi.org/10.1038/srep18178. (XLSX) [file pone.0202754.s001.xlsx]

## Sheet: Sheet2
	gene	WOM1	WOM2	WOM3	OSN1	OSN2	OSN3	Mean (WOM)	Mean (OSN)	Log(OSN/WOM)	log2 (OSN/WOM)
OSNs Markers	Gnal	99400.8	93922	104060	281947	274123	276125	99127.6	277398	0.446909	1.4846
	Omp	128077	125085	113304	431836	428805	463225	122155	441288	0.55781	1.853
	Ano2	12629.5	12741.6	13654.7	42211.8	39836.2	43680.7	13008.6	41909.6	0.508082	1.68781
	Uchl1	15046.9	15986.2	14775.7	32537.1	28628.2	35438.2	15269.6	32201.2	0.324045	1.07645
	Cnga2	27783.2	27552.4	29538	95984.1	90880.3	97923.5	28291.2	94929.3	0.525749	1.7465
	Olfr166	2557.61	2126.89	3226.18	5266.53	4456.21	4410.31	2636.89	4711.02	0.252022	0.8372
	Olfr533	1572.94	1669.21	1908.53	3641.63	4113.08	3758.24	1716.89	3837.65	0.349322	1.16042
	Olfr969	630.784	648.771	749.11	3749.39	3106.16	3396.42	676.222	3417.32	0.703597	2.3373
	Olfr1222	531.973	481.981	553.34	2636.33	2476.84	2463.54	522.431	2525.57	0.68433	2.27329
	Olfr552	449.247	388.737	478.25	2273.88	1922.43	2146.55	438.745	2114.29	0.682952	2.26872
	Olfr794	387.203	349.338	383.494	1873.47	1687.19	1634.5	373.345	1731.72	0.666367	2.21362
	Olfr19	371.117	390.707	501.492	2302.04	1799.57	1669.89	421.105	1923.83	0.659776	2.19173
	Olfr250	363.074	402.527	418.357	2910.61	2416.9	1986.88	394.653	2438.13	0.790842	2.62712
	Olfr1361	337.797	350.651	392.433	1916.33	1679.7	1569.21	360.294	1721.74	0.679312	2.25662
	Olfr1408	302.179	320.445	366.51	1691.02	1744.13	1640.79	329.711	1691.98	0.710261	2.35944
	Olfr1447	232.092	288.926	288.738	1486.53	1489.4	1273.46	269.919	1416.46	0.719972	2.3917
	Olfr437	199.921	181.892	201.133	968.571	863.073	840.059	194.315	890.567	0.66116	2.19632
	Olfr57	159.707	159.566	157.331	956.326	713.234	921.076	158.868	863.545	0.735249	2.44244
	Olfr1495	121.791	103.751	141.24	652.653	570.887	721.286	122.261	648.275	0.724473	2.40665
	Olfr826	111.45	129.36	153.755	722.449	566.391	567.905	131.522	618.915	0.672633	2.23444
	Olfr1354	130.982	109.661	130.513	580.408	513.948	637.91	123.719	577.422	0.669058	2.22256
	Olfr111	116.046	143.806	171.634	577.959	614.34	470.37	143.829	554.223	0.585839	1.94611
	Olfr76	118.344	130.673	168.952	548.571	528.932	546.667	139.323	541.39	0.589487	1.95823
	Olfr1052	116.046	100.468	125.15	617.143	528.932	530.936	113.888	559.003	0.690938	2.29525
	Olfr1446	105.705	140.523	149.286	577.959	561.896	494.754	131.838	544.87	0.616252	2.04714
	Olfr1124	102.258	108.347	143.922	645.306	480.983	526.217	118.176	550.835	0.668493	2.22069
	Olfr1100	85.0237	90.6178	147.498	646.53	561.896	439.694	107.713	549.373	0.707599	2.35059
	Olfr435	110.301	92.5877	100.12	542.449	492.97	490.034	101.003	508.484	0.701944	2.33181
	Olfr684	98.8114	93.901	103.695	465.306	353.62	443.627	98.8026	420.851	0.62936	2.09069
	Olfr869	103.407	94.5577	123.362	547.347	467.498	471.157	107.109	495.334	0.665072	2.20932
	Olfr935	90.7686	82.0813	90.2865	560.816	442.025	482.169	87.7121	495.003	0.751548	2.49659
	Olfr353	88.4706	88.6478	125.15	494.694	373.099	365.756	100.756	411.183	0.610764	2.02891
	Olfr1026	86.1727	82.0813	88.4986	407.755	428.54	379.914	85.5842	405.403	0.675493	2.24394
	Olfr819	85.0237	81.4247	121.574	543.673	383.588	302.044	96.0074	409.768	0.630233	2.09359
	Olfr23	86.1727	81.4247	110.847	465.306	382.089	384.634	92.8147	410.676	0.645883	2.14558
	Olfr399	95.3645	70.9182	111.741	371.02	361.112	430.255	92.6745	387.462	0.621269	2.06381
	Olfr22-ps1	79.2789	80.768	96.544	445.714	404.565	390.14	85.5303	413.473	0.684327	2.27329
	Olfr1109	79.2789	95.871	118.892	424.898	374.597	293.391	98.014	364.296	0.570166	1.89405
	Olfr1002	70.0871	82.738	73.3019	455.51	445.022	253.276	75.3757	384.603	0.707781	2.3512
	Olfr671	68.9382	72.8882	105.483	401.633	338.636	321.708	82.4365	353.992	0.632874	2.10236
	Olfr441	62.0443	84.7079	78.6655	429.796	353.62	373.622	75.1392	385.679	0.710359	2.35976
	Olfr607	62.0443	55.8153	87.6047	461.633	262.218	351.598	68.4881	358.483	0.718853	2.38798
	Olfr495	66.6402	64.3517	60.7869	280.408	352.122	257.209	63.9263	296.58	0.666462	2.21394
	Olfr559	59.7464	55.8153	64.3626	312.245	166.321	242.264	59.9748	240.277	0.602743	2.00227
	Olfr114	57.4485	62.3818	68.8323	237.551	221.762	215.521	62.8875	224.944	0.553511	1.83872
	Olfr585	49.4057	50.5621	50.0598	262.041	245.736	423.176	50.0092	310.317	0.792756	2.63348
	Olfr510	49.4057	72.8882	66.1505	345.306	226.257	275.3	62.8148	282.288	0.65263	2.16799
	Olfr384	50.5546	58.4419	48.272	253.469	257.723	170.686	52.4228	227.293	0.637065	2.11628
	Olfr945	43.6608	45.9655	49.1659	216.735	229.254	124.278	46.2641	190.089	0.613713	2.03871
	Olfr638	43.6608	47.2788	25.9238	279.184	178.308	262.715	38.9545	240.069	0.789778	2.62359
	Olfr1000	44.8098	45.3089	55.4234	238.775	172.315	201.362	48.514	204.151	0.624084	2.07316
	Olfr938	40.2139	28.236	47.3781	175.102	157.331	142.369	38.6093	158.267	0.6127	2.03534
	Olfr980	36.767	36.7724	50.0598	172.653	149.839	144.729	41.1998	155.74	0.577507	1.91844
	Olfr50	34.4691	45.3089	37.5449	203.265	175.312	189.564	39.1076	189.38	0.685073	2.27576
	Olfr1163	34.4691	34.1458	50.9538	211.837	208.276	96.7483	39.8562	172.287	0.635757	2.11194
	Olfr148	34.4691	47.2788	45.5902	168.98	169.318	168.326	42.446	168.875	0.599727	1.99225
	Olfr444	34.4691	27.5793	29.4995	132.245	142.347	212.374	30.516	162.322	0.72585	2.41122
	Olfr480	33.3201	46.6222	42.0145	151.837	127.363	95.1752	40.6523	124.792	0.487101	1.61811
	Olfr1402	31.0222	53.1887	43.8024	161.633	170.816	94.3886	42.6711	142.279	0.523008	1.73739
	Olfr153	31.0222	36.1158	22.3481	180	80.9131	121.132	29.8287	127.348	0.630359	2.09401
	Olfr603	29.8732	30.2059	37.5449	151.837	154.334	211.588	32.5413	172.586	0.724571	2.40697
	Olfr971	25.2773	43.3389	29.4995	151.837	127.363	128.211	32.7053	135.804	0.618294	2.05393
	Olfr1480	24.1284	25.6094	44.6963	72.2449	74.9195	63.7123	31.478	70.2922	0.3489	1.15902
	Olfr829	20.6814	43.9956	52.7416	127.347	148.341	123.492	39.1395	133.06	0.531431	1.76538
	Olfr1499	21.8304	22.9828	25.0299	122.449	62.9324	61.3526	23.281	82.2446	0.548105	1.82077
	Olfr497	17.2345	24.2961	38.4388	97.9592	125.865	80.2303	26.6565	101.351	0.580027	1.92681
	Olfr996	16.0856	19.6995	20.5603	63.6735	44.9517	40.1152	18.7818	49.5801	0.42157	1.40043
	Olfr593	13.7876	19.0429	22.3481	66.1224	68.9259	73.1512	18.3929	69.3998	0.576709	1.91579
	Olfr517	12.6387	28.236	32.1813	68.5714	88.405	76.2975	24.352	77.758	0.50421	1.67495
	Olfr830	11.4897	11.8197	16.9846	67.3469	22.4758	36.1823	13.4313	42.0017	0.495148	1.64485
	Olfr1287	9.19175	12.4764	10.7271	37.9592	14.9839	25.1703	10.7984	26.0378	0.382244	1.26979
	Olfr10	8.04279	9.19311	10.7271	29.3877	29.9678	33.8226	9.321	31.0594	0.52273	1.73647
SCCs Markers	Trpm5	318.264	288.27	264.602	153.061	169.318	127.425	290.379	149.935	-0.287063	-0.953602
	Tas1r3	129.834	159.566	153.755	110.204	115.376	106.187	147.718	110.589	-0.125722	-0.417639
	Plcb2	68.9382	76.1715	73.3019	6.12245	5.99356	2.35972	72.8038	4.82524	-1.17864	-3.91534
	Gnat3	26.4263	13.133	16.0907	0	1.49839	0.786572	18.55	0.761654	-1.38659	-4.60614
	ChAT	9.19175	8.53646	3.5757	0.0001	0.0001	0.0001	7.1013	0.0001	-4.85134	-16.1158
	Tas2r135	2.29794	1.3133	2.68178	3.67347	1.49839	2.35972	2.09767	2.51052	0.0780269	0.2592
	Tas2r143	1.14897	2.6266	1.78785	1.22449	1.49839	0.786572	1.85447	1.16982	-0.200103	-0.664727
	Tas2r134	1.14897	0.65665	0	1.22449	0	0	0.601873	0.408163	-0.168671	-0.560314
	Itpr3	1387.95	1384.88	1198.75	140.816	196.289	107.76	1323.86	148.289	-0.950735	-3.15827
	Tas1r1	471.077	436.016	438.024	456.735	497.465	479.809	448.372	478.003	0.0277918	0.0923223
Non-Neuronal markers	Neurod1	1455.74	1468.93	2019.38	168.98	205.279	50.3406	1648.02	141.533	-1.0661	-3.54152
	Tas2r118	2.29794	0.65665	1.78785	0.0001	0.0001	0.0001	1.58081	0.0001	-4.19888	-13.9484
	Tas1r2	1.14897	0.65665	0.893926	0.0001	0.0001	0.0001	0.899848	0.0001	-3.95417	-13.1355
	Tas2r105	1.14897	0.65665	1.78785	0.0001	0.0001	0.0001	1.19782	0.0001	-4.07839	-13.5481
	Tas2r116	1.14897	0.65665	0.0001	0.0001	0.0001	0.0001	0.601907	0.0001	-3.77953	-12.5553
	Tas2r114	0.0001	1.3133	0.0001	0.0001	0.0001	0.0001	0.437834	0.0001	-3.64131	-12.0962
	Tas2r139	0.0001	0	0.893926	0.0001	0.0001	0.0001	0.298009	0.0001	-3.47423	-11.5411
	Tas2r120	0.0001	0.65665	0.0001	0.0001	0.0001	0.0001	0.21895	0.0001	-3.34035	-11.0964
	Gstm1	34458.7	39072.7	34373.2	4301.63	3617.11	2013.62	35968.2	3310.79	-1.03599	-3.44148
	Six1	5461.05	5458.74	5276.84	367.347	313.163	136.077	5398.88	272.196	-1.29742	-4.30994
	Notch3	3172.3	3165.71	2570.04	301.224	287.691	172.259	2969.35	253.725	-1.0683	-3.54881
	Krt5	2703.52	2939.17	2283.09	400.408	373.099	191.137	2641.93	321.548	-0.914675	-3.03848
	Hes1	1284.55	1005.33	1269.37	188.571	227.755	132.144	1186.42	182.824	-0.812206	-2.69809
	Lgr5	353.883	394.647	420.145	26.9388	40.4565	20.4509	389.558	29.2821	-1.12397	-3.73375
	Slc18a1	70.0871	76.1715	85.8169	25.7143	13.4855	14.1583	77.3585	17.786	-0.638429	-2.12082
	Chrna9	47.1077	57.1286	51.8477	6.12245	5.99356	4.71943	52.028	5.61181	-0.967134	-3.21275
		Original data from Saraiva et al. 2015:
		https://doi.org/10.1038/srep18178
